# Supplementary material
Source: publisher figshare collection journal article supplement (https://acs.figshare.com/ndownloader/files/25741425)
Supplement: Supplementary file 1 [file 25741425]

## Supporting information

# Achieving High Performances of Ultra-Low Thermal Expansion and High Thermal Conductivity in $0.5\text{PbTiO}_3\text{-}0.5(\text{Bi}_{0.9}\text{La}_{0.1})\text{FeO}_3\text{@Cu}$ Core-Shell Composite

*Yongqiang Qiao,<sup>1</sup> Ning Xiao,<sup>1</sup> Yuzhu Song,<sup>1</sup> Shiqing Deng,<sup>2</sup> Rongjin Huang,<sup>3</sup>*

*Laifeng Li,<sup>3</sup> Xianran Xing,<sup>4</sup> Jun Chen<sup>1,2,\*</sup>*

<sup>1</sup> Beijing Advanced Innovation Center for Materials Genome Engineering, and Department of Physical Chemistry, University of Science and Technology Beijing, Beijing 100083, China

<sup>2</sup> School of Mathematics and Physics, University of Science and Technology Beijing, Beijing 100083, China

<sup>3</sup> Key Laboratory of Cryogenics, Technical Institute of Physics and Chemistry, Chinese Academy of Sciences, Beijing, China

<sup>4</sup> Beijing Advanced Innovation Center for Materials Genome Engineering, and Institute of Solid-State Chemistry, University of Science and Technology Beijing, Beijing 100083, China

## Corresponding Author

\* Jun Chen - Beijing Advanced Innovation Center for Materials Genome Engineering and School of Mathematics and Physics, University of Science and Technology Beijing, Beijing 100083, China

Email: [junchen@ustb.edu.cn](mailto:junchen@ustb.edu.cn)

## Supplementary Figures

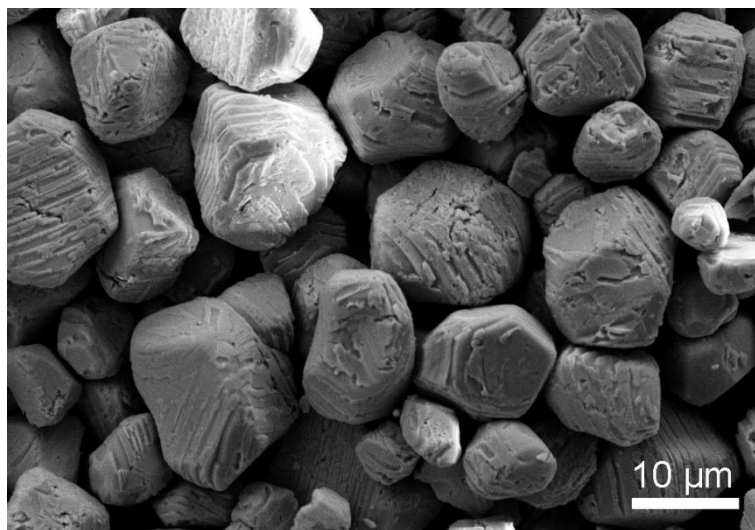

**Figure S1.** The SEM micrograph of coarsened PTBLF powders.

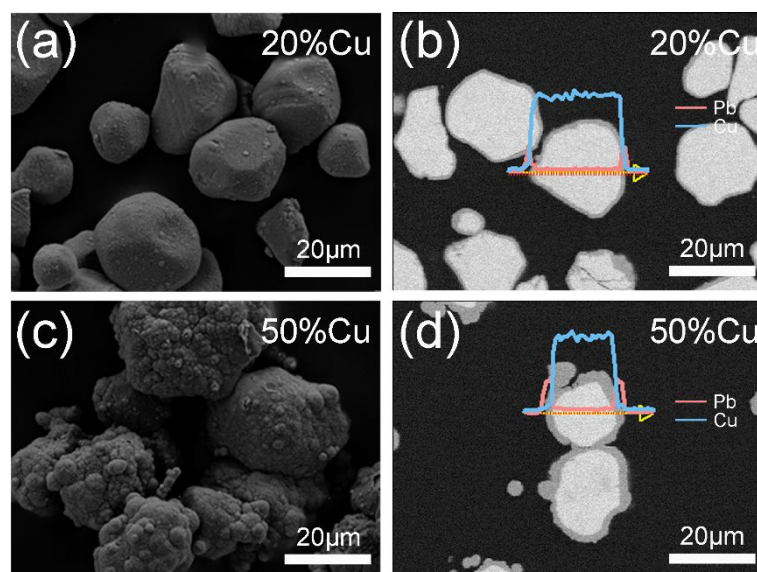

**Figure S2.** The SEM micrographs and EDS lines of coated PTBLF particles with (a,b) 20 vol.% Cu and (c,d) 50 vol.% Cu, respectively.

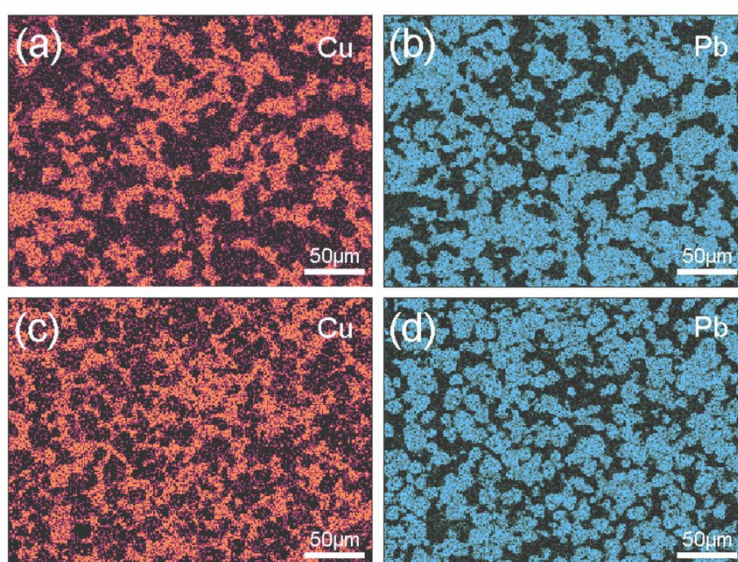

**Figure S3.** The EDS mapping of (a) Cu and (b) Pb in the uncoated 35 vol.% Cu composite, and (c) Cu and (d) Pb in the coated 35 vol.% Cu composite.

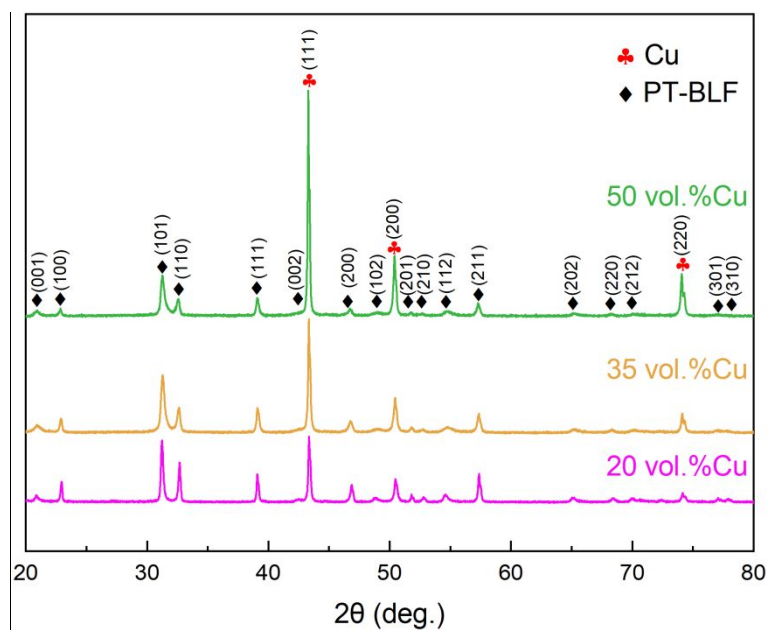

**Figure S4.** The XRD patterns of the sintered samples with 20 vol.% Cu, 35 vol.% Cu, and 50 vol.% Cu, respectively.
